# Supplementary material for: Laser capture microdissection transcriptome (LCM RNA-seq) reveals BcDFR is a key gene in anthocyanin synthesis of non-heading Chinese cabbage
Source: PubMed Central journal article supplement (PMC11059580; doi:10.1186/s12864-024-10341-y), 2024-04-29
Supplement: 12864_2024_10341_MOESM1_ESM.pdf [file 12864_2024_10341_MOESM1_ESM.pdf]

**Laser capture microdissection transcriptome (LCM RNA-seq) reveals *BcDFR* is a key gene in anthocyanin synthesis of Non-heading Chinese cabbage**

Qian Zhou<sup>1</sup>, Xinfeng Xu<sup>1</sup>, Mengjie Li<sup>1</sup>, Xiaoxue Yang<sup>1</sup>, Meiyun Wang<sup>1</sup>, Ying Li<sup>1</sup>, Xilin Hou<sup>1,2\*</sup> and Tongkun Liu<sup>1\*</sup>

<sup>1</sup>State Key Laboratory of Crop Genetics & Germplasm Enhancement, Key Laboratory of Biology and Genetic Improvement of Horticultural Crops (East China), Ministry of Agriculture and Rural Affairs of China, Engineering Research Center of Germplasm Enhancement and Utilization of Horticultural Crops, Ministry of Education of China, Nanjing Agricultural University, Nanjing 210095, China

<sup>2</sup>Nanjing Suman Plasma Engineering Research Institute, Nanjing Agricultural University, Nanjing 210095, China

\*Corresponding authors. E-mail: [hxl@njau.edu.cn](mailto:hxl@njau.edu.cn); [liutk@njau.edu.cn](mailto:liutk@njau.edu.cn)

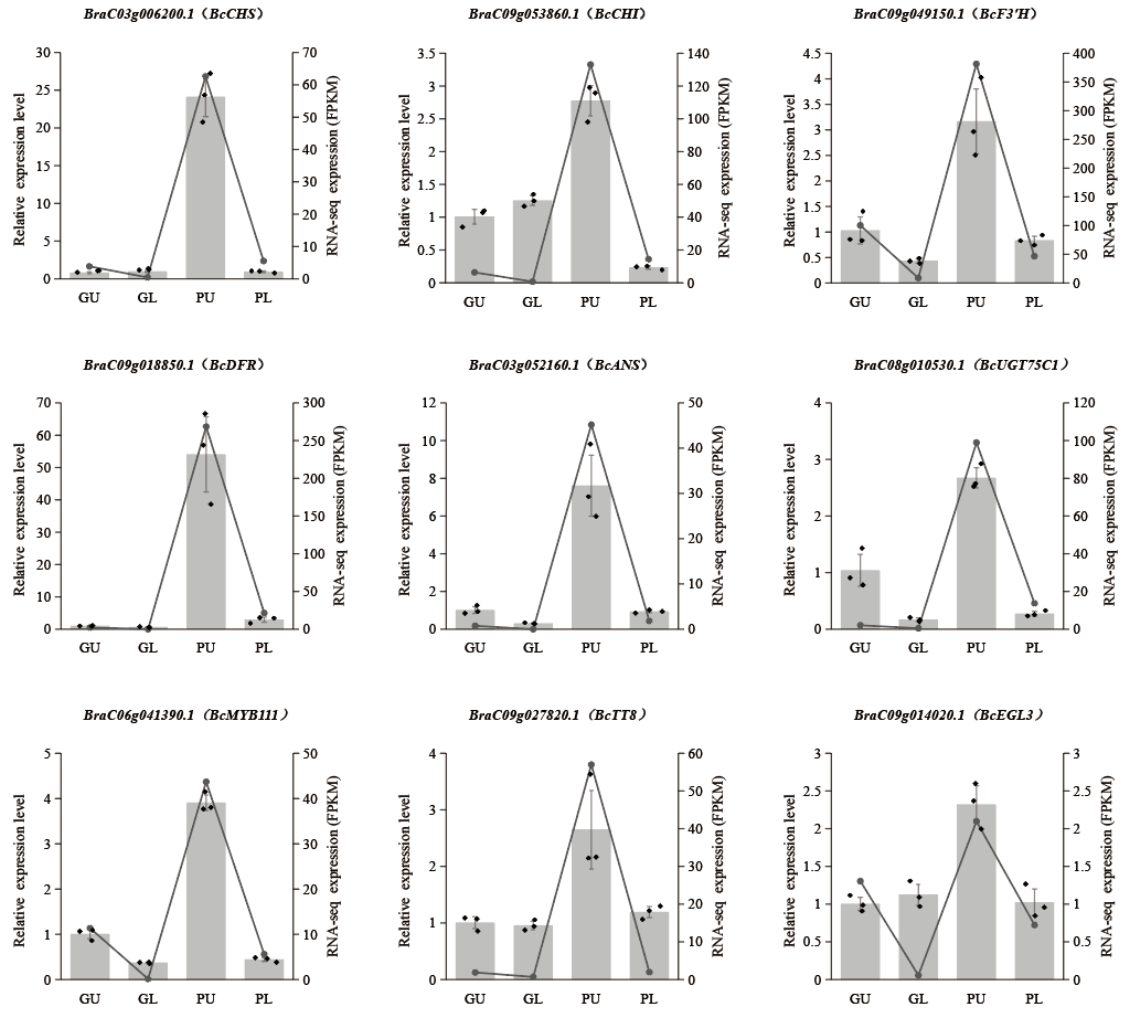

**Fig. S1 Relative expression levels of genes involved in anthocyanin biosynthesis.**

Bar and line graphs represent the qRT-PCR and RNA-seq data, respectively. Scatter plots represent individual data values. Data are presented as mean  $\pm$  SD of three biological replicates.

a

ZBC genome ACCGAAGCTACATAGTAAACCTCTTCTCCAAAGCATAATCCATCTTTCCACACAAAGATGGTAGCTCACAAAGAGACCGGTGCGTAAAC 90  
LBC genome ACCGAAGCTACATAGTAAACCTCTTCTCCAAAGCATAATCCATCTTTCCACACAAAGATGGTAGCTCACAAAGAGACCGGTGCGTAAAC 90

ZBC genome GCGGCATCRAGGATTCATTGGTTCATGGCTCCTGATGCGGCTACTGGAAACGCTGTTATTTTGTCCGTGCCACTGTCGGCATCCTGGTACA 180  
LBC genome GCGGCATCRAGGATTCATTGGTTCATGGCTCCTGATGCGGCTACTGGAAACGCTGTTATTTTGTCCGTGCCACTGTCGGCATCCTGGTACA 180

ZBC genome TATCTTACAAACTCGTAAATTTCTCCGAGAGATAGTAAATAAGTAACTTACGAGTGTCTTGGCCGTAAAGGAAATTTGAAAGAACTC 270  
LBC genome TATCTTACAAACTCGTAAATTTCTCCGAGAGATAGTAAATAAGTAACTTACGAGTGTCTTGGCCGTAAAGGAAATTTGAAAGAACTC 270

ZBC genome CAACATCTTCTTGAATTTGCCAAACCGGAAGACCAACTCACITTTATGAAAGCCGATTTATCTGAGCAAGGAAGCTACGATGACGCCATA 360  
LBC genome CAACATCTTCTTGAATTTGCCAAACCGGAAGACCAACTCACITTTATGAAAGCCGATTTATCTGAGCAAGGAAGCTACGATGACGCCATA 360

ZBC genome AACGGATGGCAGCGGCTTTCCACATAGCAACTCCCATGGATTTTGAATCTAAGGACCCCGAGGTGAGTTACTACTGAACTTTTTTTA 450  
LBC genome AACGGATGGCAGCGGCTTTCCACATAGCAACTCCCATGGATTTTGAATCTAAGGACCCCGAGGTGAGTTACTACTGAACTTTTTTTA 450

ZBC genome TTACATATCAATCTTACAACTTTTGTAAATGAGTTTCTTCAATCAGAACCAACTGATAAAAACCGCAGTGAATGGACTGTTGGGAT 540  
LBC genome TTACATATCAATCTTACAACTTTTGTAAATGAGTTTCTTCAATCAGAACCAACTGATAAAAACCGCAGTGAATGGACTGTTGGGAT 540

ZBC genome AATGAAAGCATGTGATAAGGCCAAAGCCCTACGAAAGATTTGCTTACTTCTGCTGCGGAACGGTAAATGTTGAGGAACACCCAGAAAA 630  
LBC genome AATGAAAGCATGTGATAAGGCCAAAGCCCTACGAAAGATTTGCTTACTTCTGCTGCGGAACGGTAAATGTTGAGGAACACCCAGAAAA 630

ZBC genome TGTCTATGATGAAAACGATTTGGAGTGAATTTGACTTTTATCATGTCCAAAGAAATGACAGGATGGTAAATATAATTAAGGATCATATATA 720  
LBC genome TGTCTATGATGAAAACGATTTGGAGTGAATTTGACTTTTATCATGTCCAAAGAAATGACAGGATGGTAAATATAATTAAGGATCATATATA 720

ZBC genome AAAATTAACCTGAGGTGATCTTCTCCAAAGTATTTATGTTTTGATAAATTTGTTGGCAGATGATTTTCATGTCGAAAACGTTAGCCGAC 810  
LBC genome AAAATTAACCTGAGGTGATCTTCTCCAAAGTATTTATGTTTTGATAAATTTGTTGGCAGATGATTTTCATGTCGAAAACGTTAGCCGAC 810

ZBC genome AAACGAGCTTGGCATTACGCCAAGGAAAACGAATAGATTTTACTACTTATCCCGCATTTGGTATCGGTCGATTTTATAACCAACTCT 900  
LBC genome AAACGAGCTTGGCATTACGCCAAGGAAAACGAATAGATTTTACTACTTATCCCGCATTTGGTATCGGTCGATTTTATAACCAACTCT 900

ZBC genome NTGGCGCTAGCCTTATACCGCGCTCTCTCTATACACCTGAGTGGCCCTACTTCTTATCCCTTTTTTTTTTAACTAAGAGGTTAA 990  
LBC genome NTGGCGCTAGCCTTATACCGCGCTCTCTCTATACACCTGAGTGGCCCTACTTCTTATCCCTTTTTTTTTTAACTAAGAGGTTAA 990

ZBC genome TTTAAACTGTAAAATGTTTTAGGTAAGGAGGCACATTAATCCATCAAGACAAGGACAGATATGTCACCTTGGACGACTATGCAAAATGCC 1080  
LBC genome TTTAAACTGTAAAATGTTTTAGGTAAGGAGGCACATTAATCCATCAAGACAAGGACAGATATGTCACCTTGGACGACTATGCAAAATGCC 1080

ZBC genome CATATATCTTGTACGAAACAGCTGTCGCCAAGGACGTTAATGTTTTGTTCCCTCACAGATGCAACGATTTCTTACTATCTCCGAGTTTTCT 1170  
LBC genome CATATATCTTGTACGAAACAGCTGTCGCCAAGGACGTTAATGTTTTGTTCCCTCACAGATGCAACGATTTCTTACTATCTCCGAGTTTTCT 1170

ZBC genome AGGCAAAAATATCCGAAATATAACCGTCCCTTCAACCGTAAAGATTTTATCCATACCGGTTAAAGCTGTGTTTGGATATCTTAAATTTTT 1260  
LBC genome AGGCAAAAATATCCGAAATATAACCGTCCCTTCAACCGTAAAGATTTTATCCATACCGGTTAAAGCTGTGTTTGGATATCTTAAATTTTT 1260

ZBC genome TTTTCTCAATATGAATCTTTTGGAAAGCTTTGAAGGAGTGCATGACAATCAAAGACCATATGTTTCTGAGTCCCAAGAACCTGATTCAT 1350  
LBC genome TTTTCTCAATATGAATCTTTTGGAAAGCTTTGAAGGAGTGCATGACAATCAAAGACCATATGTTTCTGAGTCCCAAGAACCTGATTCAT 1350

ZBC genome ATGGGATTTAACTTCAAGTATAGTCTCGAGGATATGTTGGTGGAAATCGATGAGACATGTCGTCAAAAGGTTTCTCCCTGTCACCTTA 1440  
LBC genome ATGGGATTTAACTTCAAGTATAGTCTCGAGGATATGTTGGTGGAAATCGATGAGACATGTCGTCAAAAGGTTTCTCCCTGTCACCTTA 1440

ZBC genome CCGGAACATTTGAAATCTGAGGACAAAGTTCCGCGCAGTGAATGATAATTAAGGAGTAAACACGGATCTGCAGGTTTAACTGATGGTATC 1530  
LBC genome CCGGAACATTTGAAATCTGAGGACAAAGTTCCGCGCAGTGAATGATAATTAAGGAGTAAACACGGATCTGCAGGTTTAACTGATGGTATC 1530

ZBC genome GTAGCTTGTAAAGAACCCGAACAGGGATGCGCGGAGAAAAGCCGATAGTACATGTCGGCACAGCAGATCTGTGCTTAGAAAATGAAC 1620  
LBC genome GTAGCTTGTAAAGAACCCGAACAGGGATGCGCGGAGAAAAGCCGATAGTACATGTCGGCACAGCAGATCTGTGCTTAGAAAATGAAC 1620

ZBC genome CCGTATCAATATGGATCTATGCTTATCAATGTGATTTCTTTTTTGTCTTTTAACTTCTATGAAAGCTGTTCTGGACTTAT 1710  
LBC genome CCGTATCAATATGGATCTATGCTTATCAATGTGATTTCTTTTTTGTCTTTTAACTTCTATGAAAGCTGTTCTGGACTTAT 1710

ZBC genome TTTATGGTATATGATATCATGTTGAGTGTCTAAAAATATGAATCAATATTTAAATTAACCGTAAAAATGAAACCCGATATCTAATATGG 1800  
LBC genome TTTATGGTATATGATATCATGTTGAGTGTCTAAAAATATGAATCAATATTTAAATTAACCGTAAAAATGAAACCCGATATCTAATATGG 1800

ZBC genome ATCTATTTGCTTATGAAATGTGATTTGTTTTTTTGGTCTTTTTTAAAGTTGATGAAAGTGTGTTGACTTATTTATGGTATATGATA 1890  
LBC genome ATCTATTTGCTTATGAAATGTGATTTGTTTTTTTGGTCTTTTTTAAAGTTGATGAAAGTGTGTTGACTTATTTATGGTATATGATA 1890

ZBC genome TCAATGTTGAGTGTGTAATAATATGAATCAATATTTAAATTAACCGTAAACGATGGCAGTGAATATATGAATCCGAAATACATA 1980  
LBC genome TCAATGTTGAGTGTGTAATAATATGAATCAATATTTAAATTAACCGTAAACGATGGCAGTGAATATATGAATCCGAAATACATA 1980

ZBC genome TGGATGATGATACAGTCTTACGGAAGTACAGGTTGTAATCAGGCTATATAACGAAAAAATATACCTCAACAGAAAAACAACTGAGC 2070  
LBC genome TGGATGATGATACAGTCTTACGGAAGTACAGGTTGTAATCAGGCTATATAACGAAAAAATATACCTCAACAGAAAAACAACTGAGC 2070

ZBC genome TTTCTATGGACCCACACACCACCTTTATAACTTTTACTTCCAAGCTACAGTCTTCTCGGAAATGCAATATTTCTTT 2146  
LBC genome TTTCTATGGACCCACACACCACCTTTATAACTTTTACTTCCAAGCTACAGTCTTCTCGGAAATGCAATATTTCTTT 2146

b

ZBC promoter TCTGCCACATCCGACAAATCAAGCTGTTTTTGGACAAATATATATGATATGGATAAACCCTATTTATGAGATAGITTTTGGCTGTGAGT 90  
LBC promoter TCTGCCACATCCGACAAATCAAGCTGTTTTTGGACAAATATATATGATATGGATAAACCCTATTTATGAGATAGITTTTGGCTGTGAGT 90

ZBC promoter AAGTCCATTAATAATGGTATAGACTTCACTGCTGAGTCTATCATATAATTTCCACATAAACACTTTCATACCTATATAGCATCTATA 180  
LBC promoter AAGTCCATTAATAATGGTATAGACTTCACTGCTGAGTCTATCATATAATTTCCACATAAACACTTTCATACCTATATAGCATCTATA 180

ZBC promoter AGTGGTTCATATTTGCTCTGCTATGCTGAGATGTTGGCTTGGCTGTTTCCACTGGACCATTTTCTACCCACATTTGAGAGGAAGCTA 270  
LBC promoter AGTGGTTCATATTTGCTCTGCTATGCTGAGATGTTGGCTTGGCTGTTTCCACTGGACCATTTTCTACCCACATTTGAGAGGAAGCTA 270

ZBC promoter TTAATGATATCCACATGTAATAATCAAGTCTCTTAGACAATATATCTCTATGGTAAACITTCACCTCAATAGTACTTTTTGGC 360  
LBC promoter TTAATGATATCCACATGTAATAATCAAGTCTCTTAGACAATATATCTCTATGGTAAACITTCACCTCAATAGTACTTTTTGGC 360

ZBC promoter TCTCAATTAAGTCTTCACTGATAAAAATAAATCTCTGAGGTGCTTTCTCTCATCAAAAACACTAGACAACCCGAAAAATACCTTAGA 450  
LBC promoter TCTCAATTAAGTCTTCACTGATAAAAATAAATCTCTGAGGTGCTTTCTCTCATCAAAAACACTAGACAACCCGAAAAATACCTTAGA 450

ZBC promoter ACCGACCATACTAACAACCAATTCAGCCACATCTAACGTTGATCTCTAGAAGTCAATGAAGGCAATCTACAACATTCGGTTAGACAAAT 540  
LBC promoter ACCGACCATACTAACAACCAATTCAGCCACATCTAACGTTGATCTCTAGAAGTCAATGAAGGCAATCTACAACATTCGGTTAGACAAAT 540

ZBC promoter CPACAATCTCAATCTTATAGAACCATATACTGAGCCCATATAGCAAAATAAAGAACTTCTCCACTCCG-----TTTATA 614  
LBC promoter CPACAATCTCAATCTTATAGAACCATATACTGAGCCCATATAGCAAAATAAAGAACTTCTCCACTCCGTTAAGCACTTACACTCTTTATA 630

ZBC promoter AANCAACCCGGAACATCGATCAACCACTCACATTGATACCGAANCAACAAATAAGCAAAAGAGAAATTCAGCTCCCTGAT 704  
LBC promoter AANCAACCCGGAACATCGATCAACCACTCAC-----AANCAACAAATAAGCAAAAGAGAAATTCAGCTCCCTGAT 709

ZBC promoter GAAAAATCACTGGAGCTGGTTAAGAAATGAAGGAAGTCCCAATGAAATACGAAAGGCTGAAGAAAGATAGAAAGTACTGTTTTGTGTC 794  
LBC promoter GAAAAATCACTGGAGCTGGTTAAGAAATGAAGGAAGTCCCAATGAAATACGAAAGGCTGAAGAAAGATAGAAAGTACTGTTTTGTGTC 799

ZBC promoter AATGATGATATTTAAAAATAGTTTTTATTAATAAAGATAGCATGTACATTTAAAGAGAAATCACTAGTAAATATCTTGTAGGC 884  
LBC promoter AATGATGATATTTAAAAATAGTTTTTATTAATAAAGATAGCATGTACATTTAAAGAGAAATCACTAGTAAATATCTTGTAGGC 889

ZBC promoter CAAAAAATAAATAAATCAATGTCAAAAGAAATCCCTAATCGCCAAATATATATAATAAATAAATAATTTGAAAACAAATGAAAAGAAAGTA 974  
LBC promoter CAAAAAATAAATAAATCAATGTCAAAAGAAATCCCTAATCGCCAAATATATAATAAATAAATAATTTGAAAACAAATGAAAAGAAAGTA 979

ZBC promoter GATGGCAATCTTGTGCTTTCTCACCACCAAGCAACTTCGAGCCACCGCACATTTCTCCGCGGCTACAGTACAGTACATCCAAAAC 1064  
LBC promoter GATGGCAATCTTGTGCTTTCTCACCACCAAGCAACTTCGAGCCACCGCACATTTCTCCGCGGCTACAGTACAGTACATCCAAAAC 1069

ZBC promoter TAATAAATCAATCAACTTACCAGTTTCCAAAGTACCAAAACAAATCAAGTCCCTAGCCAACTAACCTTCCACACGTTCTTCCCGGTAG 1154  
LBC promoter TAATAAATCAATCAACTTACCAGTTTCCAAAGTACCAAAACAAATCAAGTCCCTAGCCAACTAACCTTCCACACGTTCTTCCCGGTAG 1159

ZBC promoter TACTACAGTACAGGTTGCTTCTTAAATAGCAATGTTGAGGCTGTTGTTGCTTATAAATGTTTTCTTATAGCAGAAAGATTTCCACCGA 1244  
LBC promoter TACTACAGTACAGGTTGCTTCTTAAATAGCAATGTTGAGGCTGTTGTTGCTTATAAATGTTTTCTTATAGCAGAAAGATTTCCACCGA 1249

ZBC promoter AGCTACATAGTAAACTCTTTCTCAAAGATAAATCCATCTTCCACACAAAG 1296  
LBC promoter AGCTACATAGTAAACTCTTTCTCAAAGATAAATCCATCTTCCACACAAAG 1301

**Fig.S2 Gene and promoter sequence comparison results of *BcDFR* in ZBC, LBC. (a) Results of the 2146 bp full length genome sequence comparison. (b) Results of the 1296 bp promoter sequence comparison.**

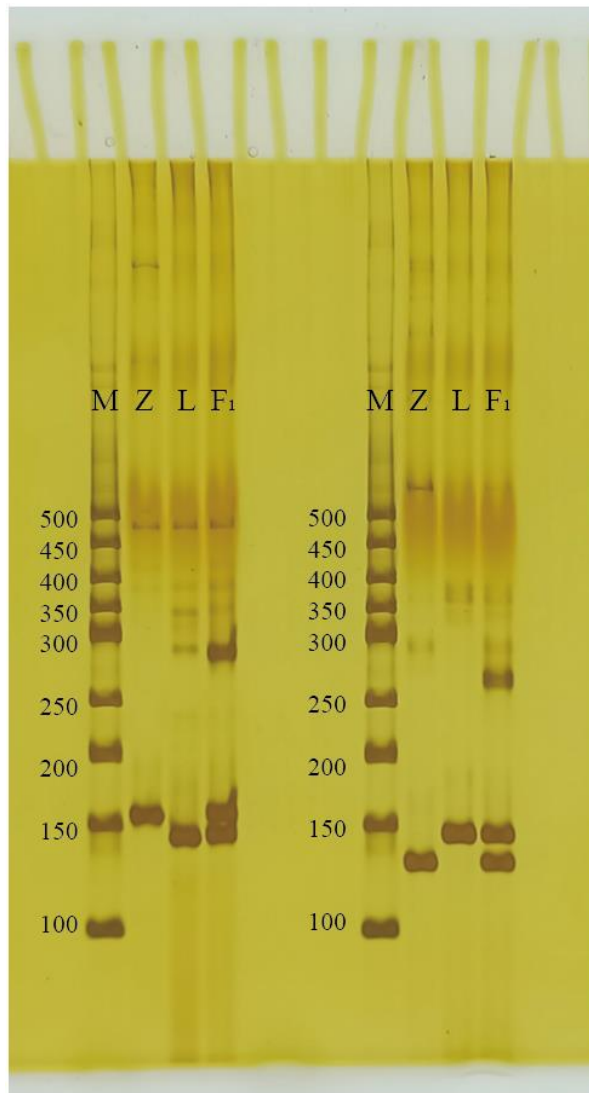

**Fig.S3 Full-length polyacrylamide gel electrophoresis of amplification of insertion and deletion markers on ZBC, LBC and F<sub>1</sub>.**

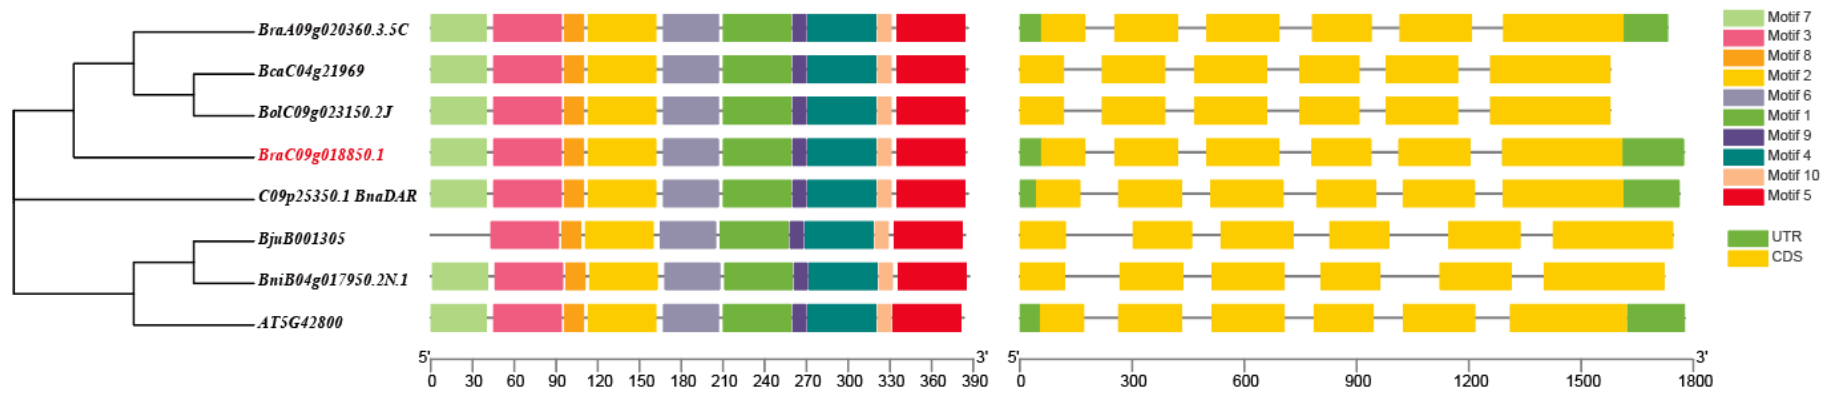

**Fig.S4 Evolution, gene structure and conserved domain analysis of DFR homologs in Arabidopsis and six *Brassica* species.**

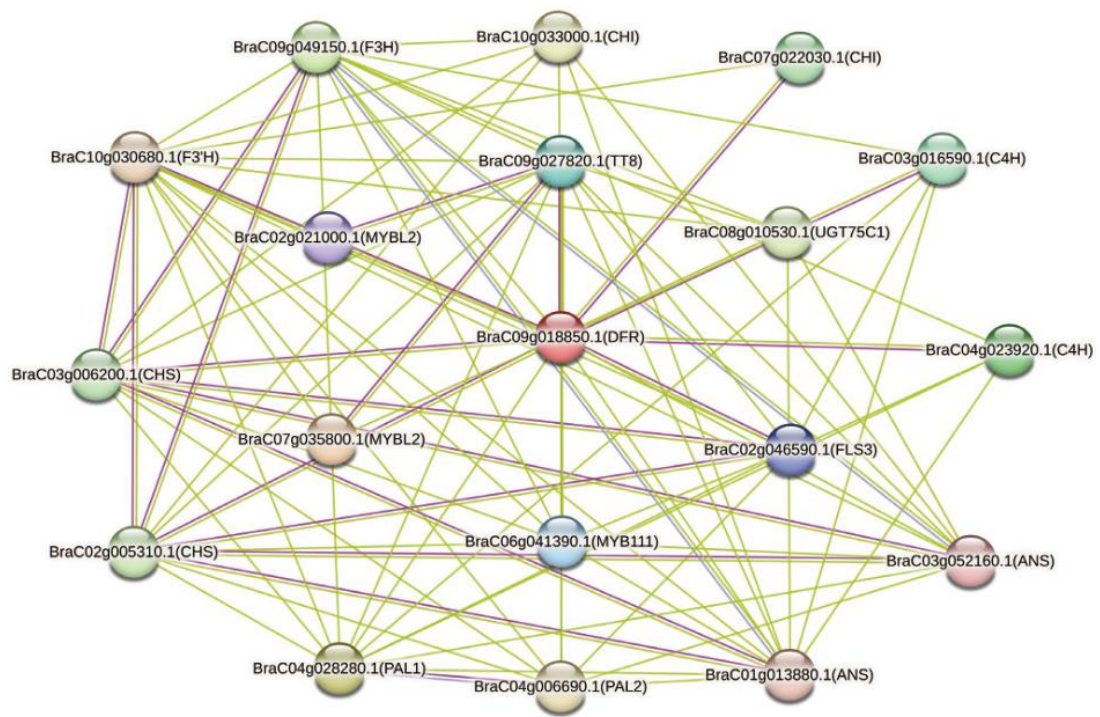

**Fig.S5 Protein-protein interaction network between *BcDFR* and anthocyanin-related DEGs.**

## Heatmap

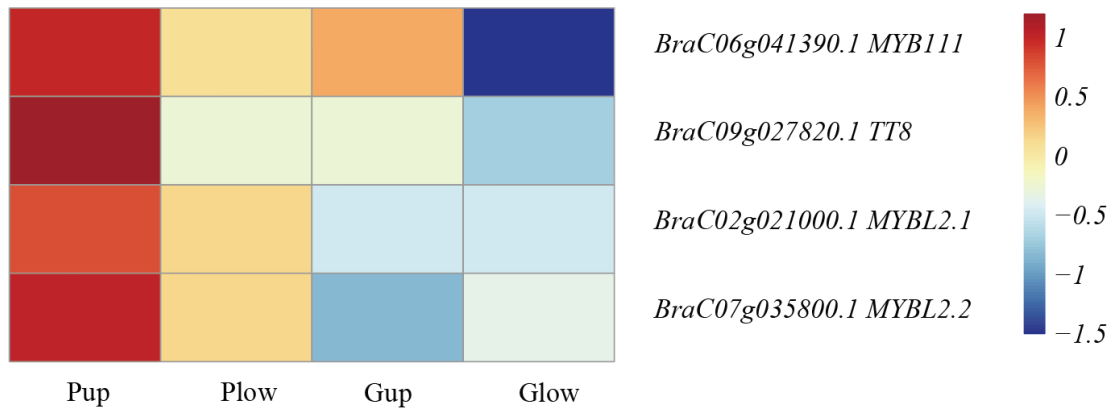

**Fig.S6 Heat map of gene expression patterns of *BcMYB111*, *BcTT8* and *BcMYBL2*.**
